# Supplementary material for: bZIP17 regulates heat stress tolerance at reproductive stage in Arabidopsis
Source: PubMed Central journal article supplement (PMC9590554; doi:10.1007/s42994-021-00062-1), 2021-11-25
Supplement: 42994_2021_62_MOESM1_ESM.pdf [file 42994_2021_62_MOESM1_ESM.pdf]

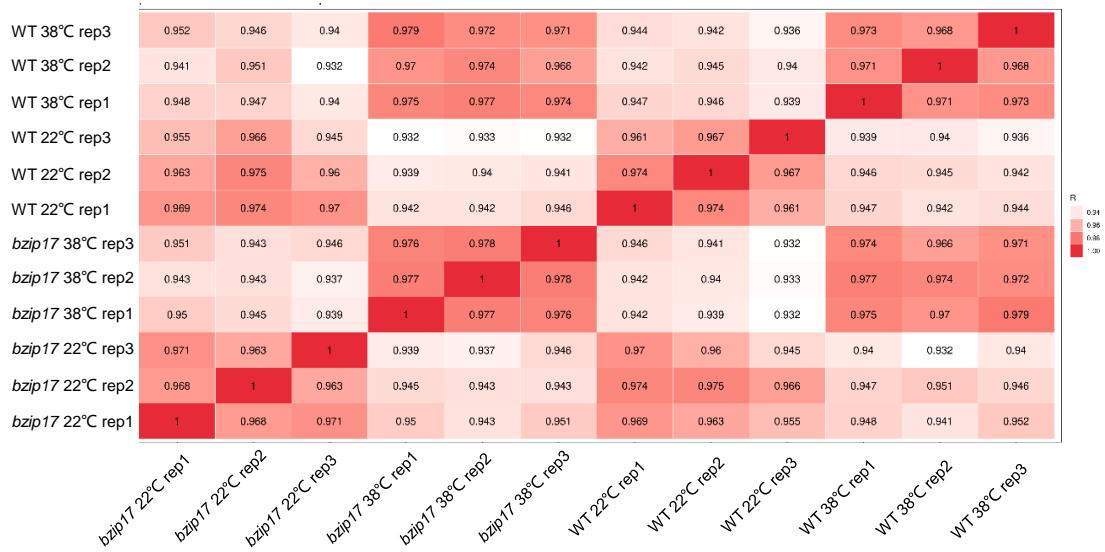

**Supplemental Fig. 1.** Cluster analysis of gene expression in all the tested samples in RNA-Seq analysis.

The wild-type plants (WT) and *AtbZIP17* mutant (*bzip17*) plants were treated (38° C) or non-treated (22° C) for 6 h and subjected to RNA-Seq analysis. There were three biological replicates (Rep) in the experiment.

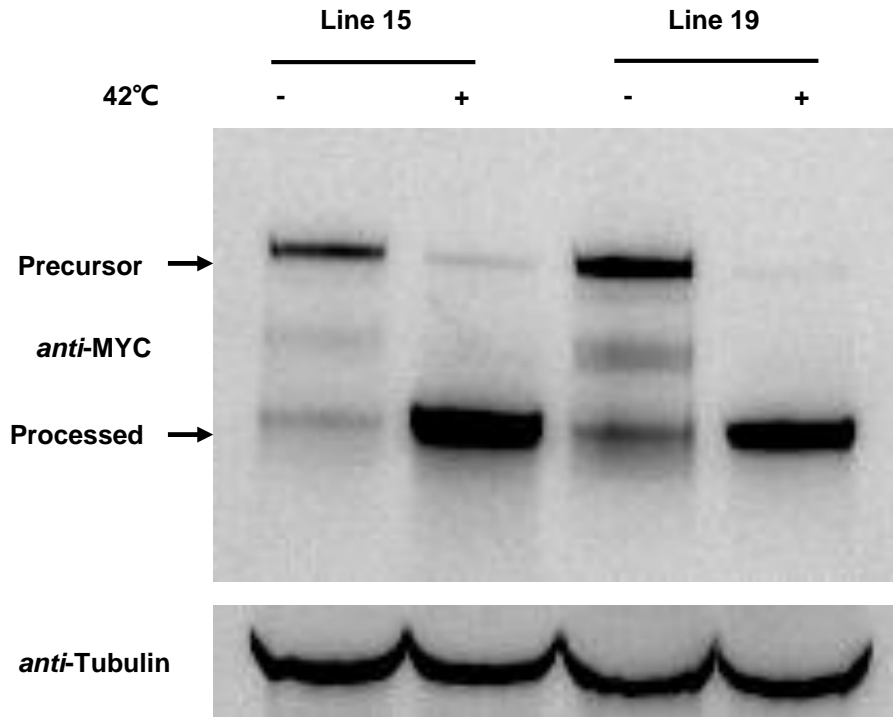

**Supplemental Fig. 2.** AtbZIP17 is activated under heat stress conditions.

Two transgenic lines overexpression *MYC-bZIP17* were treated or non-treated with heat stress for 2 h and total proteins were extracted for detecting protein processing using anti-MYC antibody in western blots. The precursor and processed forms are indicated with arrows.

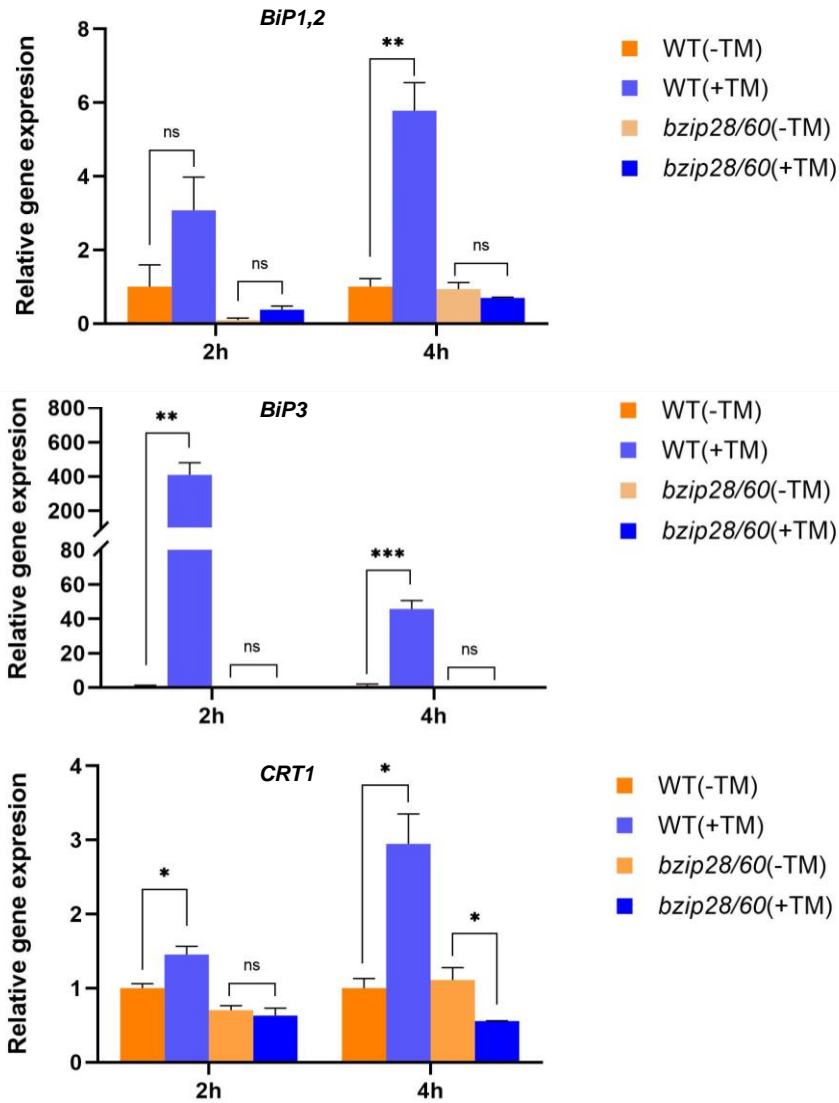

**Supplemental Fig. 3.** Mutations of both *AtbZIP28* and *AtbZIP60* block the up-regulation of UPR marker genes.

Wildtype (WT) and *bzip28 bzip60* double mutant plants were treated or non-treated with ER stress inducer tunicamycin (TM) for 2 h and 4 h, respectively, and total RNAs were extracted for quantitative RT-PCR (RT-qPCR) analysis of UPR marker genes. Relative gene expression is the expression level of each gene normalized to that in the WT plants, both of which were normalized to that of *ACTIN*. The bars depict the SE (n=3). \*\*\*, (P < 0.001); \*\*, (P < 0.01); \*, (P < 0.05); ns, (not significant at P < 0.05) in T-tests.
